# Supplementary material for: Exploring the Associations between Single-Child Status and Childhood High Blood Pressure and the Mediation Effect of Lifestyle Behaviors
Source: MDPI journal article supplement (doi:10.3390/nu14030500), 2022-01-24
Supplement: s1 [file s1]

**Table S1.** Moderation of lifestyle behaviors on the association between single-child status and BP z score in girls ( $n=25030$ ).

| Moderator                      | SBP |         |           | DBP |         |         |
|--------------------------------|-----|---------|-----------|-----|---------|---------|
|                                | Df  | F value | P value   | Df  | F value | P value |
| Meat consumption per week      | 3   | 1.053   | 0.368     | 3   | 0.953   | 0.414   |
| Fruits consumption per week    | 3   | 1.093   | 0.350     | 3   | 0.772   | 0.509   |
| Vegetable consumption per week | 3   | 1.283   | 0.278     | 3   | 1.142   | 0.330   |
| Beverage consumption per week  | 2   | 0.044   | 0.957     | 2   | 0.092   | 0.912   |
| Physical activity              | 2   | 0.920   | 0.399     | 2   | 0.475   | 0.622   |
| Sleeping duration              | 2   | 6.979   | <0.001*** | 2   | 5.376   | 0.005** |

Adjusted for age, birth weight, gestational age, breastfeeding, delivery mode, family history of hypertension, parental highest education degree, BMI z score. The moderation effect of sedentary behavior was examined by hierarchical multiple regression. The R-square variation was 0.000 and F statistics variation was 3.229 ( $p=0.072$ ) for SBP and the R-square variation was 0.000 and F statistics variation was 0.169 ( $p=0.681$ ) for DBP. \*\* $p < 0.01$ , \*\*\* $p < 0.001$ .

**Table S2.** Moderation of lifestyle behaviors on the association between single-child status and HBP in girls ( $n=25030$ ).

| Moderator                      | HBP              |         |
|--------------------------------|------------------|---------|
|                                | OR (95%CI)       | P value |
| Meat consumption per week      |                  |         |
| 0~1 day(s)                     | 1 (ref)          |         |
| 2~3 days                       | 1.11 (0.86~1.43) | 0.424   |
| 4~5 days                       | 1.08 (0.82~1.41) | 0.596   |
| 6~7 days                       | 1.16 (0.91~1.48) | 0.242   |
| Fruits consumption per week    |                  |         |
| 0~1 day(s)                     | 1 (ref)          |         |
| 2~3 days                       | 0.97 (0.68~1.40) | 0.890   |
| 4~5 days                       | 1.17 (0.83~1.67) | 0.369   |
| 6~7 days                       | 1.18 (0.84~1.66) | 0.333   |
| Vegetable consumption per week |                  |         |
| 0~1 day(s)                     | 1 (ref)          |         |
| 2~3 days                       | 0.79 (0.50~1.24) | 0.305   |
| 4~5 days                       | 1.12 (0.73~1.72) | 0.599   |
| 6~7 days                       | 1.11 (0.76~1.63) | 0.575   |
| Beverage consumption per week  |                  |         |
| 0 day                          | 1 (ref)          |         |
| 1~2 days                       | 0.99 (0.97~1.02) | 0.505   |
| 3 days and more                | 0.98 (0.95~1.02) | 0.301   |
| Physical activity              |                  |         |
| Low intensity                  | 1 (ref)          |         |
| Median intensity               | 1.00 (0.97~1.04) | 0.985   |
| High intensity                 | 1.00 (0.97~1.04) | 0.829   |
| Sedentary behavior             | 1.00 (1.00~1.00) | 0.601   |
| Sleeping duration              |                  |         |
| Adequate sleep                 | 1 (ref)          |         |
| Insufficient sleep             | 1.03 (1.00~1.05) | 0.042*  |
| Hypersomnia                    | 1.09 (1.00~1.19) | 0.048*  |

Adjusted for age, birth weight, gestational age, breastfeeding, delivery mode, family history of hypertension, parental highest education degree, BMI z score. Abbreviation: HBP, high blood pressure. \* $p < 0.05$ .

**Table S3.** Mediation of lifestyle behaviors on the association between single-child status and BP in boys ( $n=25661$ ).

| Mediator                       | $n$  | Outcome     | Total association      |       | Direct association     |       | Indirect association |         | Mediation proportion |
|--------------------------------|------|-------------|------------------------|-------|------------------------|-------|----------------------|---------|----------------------|
|                                |      |             | $\beta$ (95%CI)        | $P$   | $\beta$ (95%CI)        | $P$   | $\beta$ (95%CI)      | $P$     |                      |
| Meat consumption per week      | 2015 | SBP z score | -0.033 (-0.065~-0.000) | 0.047 | -0.036 (-0.068~-0.004) | 0.028 | 0.003 (0.001~0.006)  | 0.013** | -10.72%              |
|                                | 3    |             |                        |       |                        |       |                      |         |                      |
|                                | 2015 | DBP z score | -0.014 (-0.046~-0.018) | 0.395 | -0.017 (-0.049~-0.015) | 0.298 | 0.003 (0.001~0.006)  | 0.014** | -22.37%              |
| Fruits consumption per week    | 2016 | HBP         | -0.068 (-0.140~-0.004) | 0.065 | -0.071 (0.143~-0.001)  | 0.054 | 0.003 (0.000~0.006)  | 0.025*  | -4.55%               |
|                                | 9    |             |                        |       |                        |       |                      |         |                      |
|                                | 2011 | SBP z score | -0.034 (-0.066~-0.002) | 0.039 | -0.031 (-0.063~-0.001) | 0.060 | —                    | —       | —                    |
| Vegetable consumption per week | 2011 | DBP z score | -0.013 (-0.045~-0.018) | 0.410 | -0.011 (-0.043~-0.021) | 0.489 | —                    | —       | —                    |
|                                | 6    |             |                        |       |                        |       |                      |         |                      |
|                                | 2013 | HBP         | -0.067 (-0.014~-0.005) | 0.069 | -0.064 (-0.014~-0.008) | 0.082 | —                    | —       | —                    |
| Beverage consumption per week  | 2015 | SBP z score | -0.035 (-0.067~-0.003) | 0.035 | -0.035 (-0.067~-0.002) | 0.035 | —                    | —       | —                    |
|                                | 7    |             |                        |       |                        |       |                      |         |                      |
|                                | 2015 | DBP z score | -0.015 (-0.047~-0.016) | 0.341 | -0.015 (-0.047~-0.016) | 0.343 | —                    | —       | —                    |
| Physical activity              | 2017 | HBP         | -0.071 (-0.143~-0.001) | 0.054 | -0.071 (-0.143~-0.002) | 0.055 | —                    | —       | —                    |
|                                | 3    |             |                        |       |                        |       |                      |         |                      |
|                                | 2003 | SBP z score | -0.033 (-0.066~-0.001) | 0.044 | -0.034 (-0.066~-0.001) | 0.041 | 0.001 (-0.000~0.001) | 0.113   | —                    |
| Sedentary behavior             | 2004 | DBP z score | -0.014 (-0.045~-0.018) | 0.402 | -0.014 (-0.046~-0.018) | 0.378 | 0.001 (-0.000~0.002) | 0.088   | —                    |
|                                | 0    |             |                        |       |                        |       |                      |         |                      |
|                                | 2005 | HBP         | -0.071 (-0.143~-0.002) | 0.056 | -0.071 (0.143~-0.002)  | 0.055 | 0.000 (-0.001~0.001) | 0.748   | —                    |
| Sleeping duration              | 1828 | SBP z score | -0.022 (-0.056~-0.012) | 0.200 | -0.022 (-0.056~-0.012) | 0.202 | —                    | —       | —                    |
|                                | 1    |             |                        |       |                        |       |                      |         |                      |
|                                | 1828 | DBP z score | -0.000 (-0.034~-0.033) | 0.992 | 0.001 (-0.032~-0.035)  | 0.939 | —                    | —       | —                    |
|                                | 2    |             |                        |       |                        |       |                      |         |                      |
|                                | 1829 | HBP         | -0.039 (-0.115~-0.037) | 0.312 | -0.037 (-0.112~-0.039) | 0.345 | —                    | —       | —                    |
|                                | 5    |             |                        |       |                        |       |                      |         |                      |
|                                | 1836 | SBP z score | -0.032 (-0.066~-0.001) | 0.060 | -0.032 (-0.066~-0.002) | 0.061 | —                    | —       | —                    |
|                                | 8    |             |                        |       |                        |       |                      |         |                      |
|                                | 1836 | DBP z score | -0.013 (-0.046~-0.020) | 0.444 | -0.013 (-0.046~-0.021) | 0.453 | —                    | —       | —                    |
|                                | 1838 | HBP         | -0.070 (-0.145~-0.006) | 0.071 | -0.069 (-0.145~-0.006) | 0.072 | —                    | —       | —                    |
|                                | 1    |             |                        |       |                        |       |                      |         |                      |
|                                | 1904 | SBP z score | -0.034 (-0.068~-0.001) | 0.042 | -0.034 (-0.067~-0.001) | 0.043 | —                    | —       | —                    |
|                                | 2    |             |                        |       |                        |       |                      |         |                      |

|      |       |              |       |              |       |   |   |   |
|------|-------|--------------|-------|--------------|-------|---|---|---|
| 1904 | DBP z | -0.012 (-    | 0.472 | -0.012 (-    | 0.477 | — | — | — |
| 4    | score | 0.045~0.021) |       | 0.045~0.021) |       |   |   |   |
| 1905 | HBP   | -0.070 (-    | 0.066 | -0.070 (-    | 0.066 | — | — | — |
| 7    |       | 0.144~0.005) |       | 0.001~0.000) |       |   |   |   |

Note: The independent variable in model was single-child status and the reference group was “single children”. Adjusted for age, birth weight, gestational age, breastfeeding, delivery mode, family history of hypertension, parental highest education degree, BMI z score. “—” represented the negative value of indirect association. Abbreviation: BP, blood pressure; SBP, systolic blood pressure; DBP, diastolic blood pressure; HBP, high blood pressure. \* $p < 0.05$ , \*\* $p < 0.01$

**Table S4.** Moderation of lifestyle behaviors on the association between single-child status and BP z score in boys ( $n=25661$ ).

| Moderator                      | SBP |         |         | DBP |         |         |
|--------------------------------|-----|---------|---------|-----|---------|---------|
|                                | Df  | F value | P value | Df  | F value | P value |
| Meat consumption per week      | 3   | 0.961   | 0.410   | 3   | 0.923   | 0.429   |
| Fruits consumption per week    | 3   | 1.249   | 0.290   | 3   | 0.787   | 0.501   |
| Vegetable consumption per week | 3   | 0.722   | 0.538   | 3   | 0.073   | 0.974   |
| Beverage consumption per week  | 2   | 0.312   | 0.732   | 2   | 0.310   | 0.733   |
| Physical activity              | 2   | 0.360   | 0.548   | 2   | 0.414   | 0.520   |
| Sleeping duration              | 2   | 1.900   | 0.168   | 2   | 5.080   | 0.024*  |

Adjusted for age, birth weight, gestational age, breastfeeding, delivery mode, family history of hypertension, parental highest education degree, BMI z score. The moderation effect of sedentary behavior was examined by hierarchical multiple regression. The R-square variation was 0.000 and F statistics variation was 2.486 ( $p=0.115$ ) for SBP and the R-square variation was 0.001 and F statistics variation was 1.042 ( $p=0.307$ ) for DBP. \* $P < 0.05$ .

**Table S5.** Moderation of lifestyle behaviors on the association between single-child status and HBP in boys ( $n=25661$ ).

| Moderator                       | HBP              |         |
|---------------------------------|------------------|---------|
|                                 | OR (95%CI)       | P value |
| Meat consumption per week       |                  |         |
| 0~1 day(s)                      | 1 (ref)          |         |
| 2~3 days                        | 1.46 (0.79~1.39) | 0.754   |
| 4~5 days                        | 1.49 (0.79~1.40) | 0.747   |
| 6~7 days                        | 0.95 (0.73~1.23) | 0.680   |
| Fruits consumption per week     |                  |         |
| 0~1 day(s)                      | 1 (ref)          |         |
| 2~3 days                        | 1.15 (0.87~1.52) | 0.330   |
| 4~5 days                        | 0.89 (0.67~1.17) | 0.392   |
| 6~7 days                        | 1.05 (0.81~1.36) | 0.736   |
| Vegetables consumption per week |                  |         |
| 0~1 day(s)                      | 1 (ref)          |         |
| 2~3 days                        | 0.99 (0.66~1.49) | 0.957   |
| 4~5 days                        | 1.30 (0.89~1.91) | 0.182   |
| 6~7 days                        | 1.14 (0.81~1.60) | 0.458   |
| Beverage consumption per week   |                  |         |
| 0 day                           | 1 (ref)          |         |

|                    |                  |        |
|--------------------|------------------|--------|
| 1~2 days           | 0.93 (0.78~1.09) | 0.356  |
| 3 days and more    | 0.88 (0.73~1.06) | 0.178  |
| Physical activity  |                  |        |
| Low intensity      | 1 (ref)          |        |
| Median intensity   | 0.83 (0.66~1.05) | 0.117  |
| High intensity     | 0.89 (0.72~1.10) | 0.271  |
| Sedentary behavior | 0.98 (0.96~1.00) | 0.035  |
| Sleeping duration  |                  |        |
| Adequate sleep     | 1 (ref)          |        |
| Insufficient sleep | 1.19 (1.02~1.38) | 0.024* |
| Hypersomnia        | 1.29 (0.83~1.99) | 0.260  |

---

Adjusted for age, birth weight, gestational age, breast feeding, delivery mode, family history of hypertension, parental highest education degree, BMI z score. \* $p<0.05$ .
